# Supplementary material
Source: Springer Nature journal article supplement (https://www.springermedizin.de/resource/supplementary/12885_2009_1786_MOESM6_ESM.pdf/9472928)

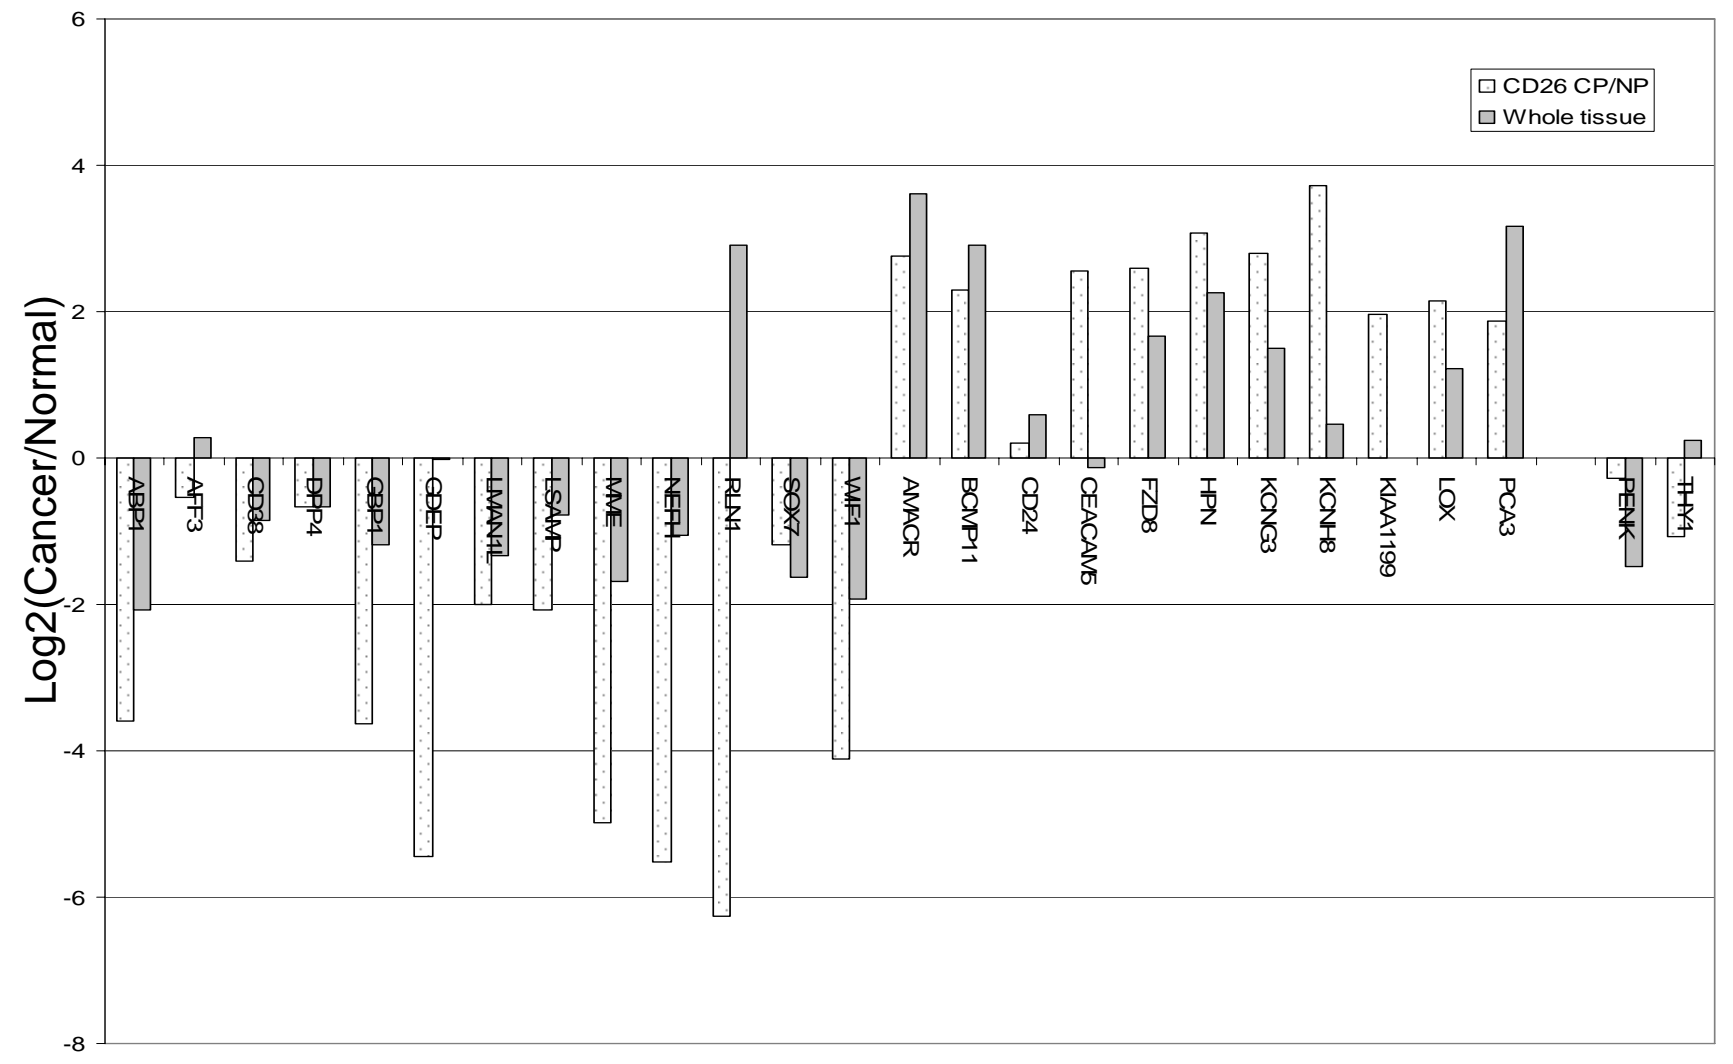

Supplement: MOESM6 [file 9472928]
